# Supplementary material for: Design, synthesis and nematicidal activity of novel 1,2,4-oxadiazole derivatives containing amide fragments
Source: Research Square preprint supplement (doi:10.21203/rs.3.rs-4772389/v1), 2024-08-16
Supplement: Supplementary file 1 [file c2313be0cc828dfce5b1795f.docx]

**Design, synthesis and nematicidal activity of novel 1,2,4-oxadiazole derivatives containing amide fragments**

Yuqin Ou, Xue Guo, Qi Zhang, Wei Zhang, Xiuhai Gan*

State Key Laboratory of Green Pesticide, Key Laboratory of Green Pesticide and Agricultural Bioengineering, Ministry of Education, Guizhou University, Guiyang 550025, China

***Corresponding author**

Tel.: 86-851-88292170; Fax: 86-851-88292170

E-mail: [gxh200719@163.com](mailto:gxh200719@163.com)

Content

[1. Characterization of title compounds **A1–A18**, **B1–B10** and **C1–C10** 3](#_Toc169595873)

[2. 1H NMR, 13C NMR and HRMS spectrum of the title compounds 4](#_Toc169595874)

1. **Characterization of title compounds A1**–**A18, B1**–**B10 and C1**–**C10**

**Table S1** The physical properties of compounds **A1**–**A18**

| Comp. | n | R1 | R2 | Appearance | m.p./℃ | Yield / % |
| --- | --- | --- | --- | --- | --- | --- |
| **A1** | 0 | C6H5 | 4-CH3-C6H4 | White solid | 85-86 | 54.1 |
| **A2** | 0 | C6H5 | C6H5 | White solid | 125-126 | 70.1 |
| **A3** | 0 | C6H5 | 4-OCH3-C6H4 | White solid | 97-98 | 71.5 |
| **A4** | 0 | C6H5 | 4-F-C6H4 | White solid | 152-153 | 73.3 |
| **A5** | 0 | 4-CH3-C6H5 | C6H5 | White solid | 134-135 | 72.1 |
| **A6** | 0 | 4-CH3-C6H5 | 2,6-diCH3- C6H3 | White solid | 147-148 | 78.1 |
| **A7** | 0 | thienyl | 4-CH3-C6H4 | White solid | 134-135 | 68.6 |
| **A8** | 0 | furan | 4-CH3-C6H4 | White solid | 118-119 | 55.7 |
| **A9** | 0 | furan | C6H5 | White solid | 132-133 | 60.5 |
| **A10** | 0 | thienyl | C6H5 | White solid | 169-170 | 54.8 |
| **A11** | 1 | 2-CF3-C6H4 | 2-Cl-4-CF3-C6H3 | White solid | 128-129 | 65.1 |
| **A12** | 1 | 2-CF3-C6H4 | 6-CF3-pyridyl | White solid | 137-138 | 55.2 |
| **A13** | 1 | 2-CF3-C6H4 | 4-CF3-C6H4 | White solid | 116-117 | 58.9 |
| **A14** | 1 | 2-CF3-C6H4 | 4-F-C6H4 | White solid | 124-125 | 60.1 |
| **A15** | 1 | 2-CF3-C6H4 | 2-CF3-C6H4 | White solid | 138-139 | 65.2 |
| **A16** | 1 | 2-Cl-4-CF3-C6H3 | 6-CF3-pyridyl | White solid | 122-123 | 60.1 |
| **A17** | 1 | thienyl | 2-CF3-C6H4 | White solid | 149-150 | 51.8 |
| **A18** | 1 | thienyl | 2-Cl-4-CF3-C6H3 | White solid | 170-171 | 52.7 |

**Table S2** The physical properties of compounds **B1**–**B10 and C1**–**C10**

| Comp. | R1 | R2 | Appearance | m.p./℃ | Yield / % |
| --- | --- | --- | --- | --- | --- |
| **B1** | 4-F-C6H4 | 2-CF3-C6H4 | White solid | 125-126 | 65.5 |
| **B2** | 4-Cl-C6H4 | 2-CF3-C6H4 | White solid | 132-133 | 60.8 |
| **B3** | 4-CF3-C6H4 | 2-CF3-C6H4 | White solid | 133-134 | 55.9 |
| **B4** | 4-CH3-C6H4 | 2-CF3-C6H4 | White solid | 117-118 | 56.8 |
| **B5** | C6H5 | 2-CF3-C6H4 | White solid | 110-111 | 59.1 |
| **B6** | 2-Cl-4-CF3-C6H3 | 2-CF3-C6H4 | White solid | 143-144 | 50.9 |
| **B7** | 2-Cl-4-CF3-C6H3 | 4-CF3-C6H4 | White solid | 114-115 | 45.1 |
| **B8** | 2,4-diCl-C6H3 | 6-CF3-pyridyl | White solid | 134-135 | 47.5 |
| **B9** | 4-F-C6H4 | 6-CF3-pyridyl | White solid | 125-126 | 45.9 |
| **B10** | 4-F-C6H4 | 2-Cl-4-CF3-C6H3 | White solid | 146-147 | 50.9 |
| **C1** | 4-F-C6H4 | 2-CF3-C6H4 | White solid | 157-158 | 55.9 |
| **C2** | 4-Cl-C6H4 | 2-CF3-C6H4 | White solid | 178-179 | 53.8 |
| **C3** | 4-CF3-C6H4 | 2-CF3-C6H4 | White solid | 168-169 | 54.1 |
| **C4** | 4-CH3-C6H4 | 2-CF3-C6H4 | White solid | 159-160 | 54.3 |
| **C5** | C6H5 | 2-CF3-C6H4 | White solid | 147-148 | 58.5 |
| **C6** | 2-Cl-4-CF3-C6H3 | 2-CF3-C6H4 | White solid | 166-167 | 48.9 |
| **C7** | 2-Cl-4-CF3-C6H3 | 4-CF3-C6H4 | White solid | 167-168 | 50.7 |
| **C8** | 2,4-diCl-C6H3 | 6-CF3-pyridyl | White solid | 116-117 | 51.7 |
| **C9** | 4-F-C6H4 | 6-CF3-pyridyl | White solid | 72-73 | 55.3 |
| **C10** | 4-F-C6H4 | 2-Cl-4-CF3-C6H3 | White solid | 144-145 | 58.1 |

1. **1H NMR, 13C NMR and HRMS spectrum of the title compounds**

*5-phenyl-N-(p-tolyl)-1,2,4-oxadiazole-3-carboxamide (****A1****)*. White solid, m.p. 85–86 ℃, yield 55.9%. 1H NMR (400 MHz, DMSO*-d*6) *δ* 10.87 (s, 1H, N-H), 8.21 (d, *J* = 6.8 Hz, 2H, Ph-H), 7.77 (t, *J* = 7.6 Hz, 1H, Ph-H), 7.71–7.67 (m, 4H, Ph-H), 7.20 (d, *J* = 8.0 Hz, 2H, Ph-H), 2.30 (s, 3H, Ph-CH3). 13C NMR (101 MHz, DMSO*-d*6) *δ* 176.53, 165.00, 155.04, 135.61, 134.44, 134.25 , 130.13, 130.13, 129.67, 129.67, 128.61, 128.61, 123.39, 121.22, 121.22, 21.01. HRMS (ESI) m/z for C16H13N3O2 [M+H]+ calcd: 280.10805, found: 280.10727.

*N,5-diphenyl-1,2,4-oxadiazole-3-carboxamide (****A2****)*. White solid. m.p. 125–126 ℃, yield 70.1%. 1H NMR (400 MHz, DMSO-*d*6) *δ* 10.96 (s, 1H, N-H), 8.22–8.20 (m, 2H, Ph-H), 7.82 (d, *J* = 7.6 Hz, 2H, Ph-H), 7.76 (t, *J* = 7.6 Hz, 1H, Ph-H), 7.68 (t, *J* = 7.6 Hz, 2H, Ph-H), 7.42–7.38 (m, 2H, Ph-H), 7.19 (t, *J* = 7.2 Hz, 1H, Ph-H). 13C NMR (101 MHz, DMSO-*d*6) *δ* 176.58 , 164.96, 155.25, 138.11, 134.26, 130.13, 130.13, 129.29, 129.29, 128.62, 128.62, 125.32, 123.38, 121.30, 121.30. HRMS (ESI) m/z for C15H11N3O2 [M+H]+ calcd: 266.09240, found: 266.09174.

*N-(4-methoxyphenyl)-5-phenyl-1,2,4-oxadiazole-3-carboxamide (****A3****)*. White solid, m.p. 97–98 ℃, yield 71.5%. 1H NMR (400 MHz, DMSO*-d*6) *δ* 10.83 (s, 1H, N-H), 8.20 (d, *J* = 7.6 Hz, 2H, Ph-H), 7.75 (dd, *J* = 15.2, 7.2 Hz, 3H, Ph-H), 7.68 (t, *J* = 7.6 Hz, 2H, Ph-H), 6.96 (d, *J* = 8.8 Hz, 2H, Ph-H), 3.76 (s, 3H, Ph-OCH3). 13C NMR (101 MHz, DMSO*-d*6) *δ* 176.51, 165.04, 156.79, 154.83, 134.23, 131.13, 130.12, 130.12, 128.60,128.60, 123.41, 122.85, 122.85, 114.39, 114.39, 55.69. HRMS (ESI) m/z for C16H13N3O3 [M+H]+ calcd: 296.10297, found: 296.10211.

*N-(4-fluorophenyl)-5-phenyl-1,2,4-oxadiazole-3-carboxamide (****A4****)*. White solid, m.p.152–153 ℃, yield 73.3%. 1H NMR (400 MHz, DMSO*-d*6) *δ* 11.04 (s, 1H, N-H), 8.22–8.20 (m, 2H, Ph-H), 7.86–7.82 (m, 2H, Ph-H), 7.79–7.75 (m, 1H, Ph-H), 7.71–7.67 (m, 2H, Ph-H), 7.25 (t, *J* = 8.8 Hz, 2H, Ph-H). 13C NMR (101 MHz, DMSO*-d*6) *δ* 176.64, 164.88, 159.41 (d, *J* = 242.4 Hz), 155.18, 134.45, 134.31, 133.32, 129.95 (d, *J* = 43.4 Hz), 129.95 (d, *J* = 43.4 Hz), 128.83 (d, *J* = 40.4 Hz), 128.83 (d, *J* = 40.4 Hz), 123.35 (d, *J* = 3.0 Hz), 123.26, 116.07, 115.85. HRMS (ESI) m/z for C15H10FN3O2 [M+H]+ calcd: 284.08298, found: 284.08237.

*N*-phenyl-5-(p-tolyl)-1,2,4-oxadiazole-3-carboxamide(**A5**). White solid, m.p. 134–135 ℃, yield 72.1%. 1H NMR (400 MHz, DMSO*-d*6) *δ* 10.93 (s, 1H, N-H), 8.09 (d, *J* = 8.0 Hz, 2H, Ph-H), 7.81 (d, *J* = 8.0 Hz, 2H, Ph-H), 7.48 (d, *J* = 8.0 Hz, 2H, Ph-H), 7.40 (t, *J* = 8.0 Hz, 2H, Ph-H), 7.18 (t, *J* = 7.6 Hz, 1H, Ph-H), 2.43 (s, 3H, Ph-CH3). 13C NMR (101 MHz, DMSO*-d*6) *δ* 176.65, 164.90, 155.30, 144.85, 138.11, 130.69, 130.69, 129.29, 129.29, 128.58, 128.58, 125.30, 121.26, 121.26, 120.64, 21.77. HRMS (ESI) m/z for C16H13N3O2 [M+H]+ calcd: 280.10805, found: 280.10718.

*N-(2,6-dimethylphenyl)-5-(p-tolyl)-1,2,4-oxadiazole-3-carboxamide (****A6****)*. White solid, m.p. 147–148 ℃, yield 78.1%. 1H NMR (400 MHz, DMSO*-d*6)*δ* 10.48 (s, 1H, Ph-H), 8.10 (d, *J* = 8.0 Hz, 2H, Ph-H), 7.49 (d, *J* = 8.0 Hz, 2H, Ph-H), 7.15 (d, *J* = 2.8 Hz, 3H, Ph-H), 2.44 (s, 3H, Ph-CH3), 2.22 (s, 6H, Ph-CH3). 13C NMR (101 MHz, DMSO*-d*6) *δ* 176.74, 164.69, 155.38, 144.81, 135.88, 135.88, 134.22, 130.70, 130.70, 128.59, 128.59, 128.34, 128.34, 127.77, 120.71, 21.77, 18.45, 18.45. HRMS (ESI) m/z for C18H17N3O2 [M+H]+ calcd: 308.13935, found: 308.13821.

*5-(thiophen-2-yl)-N-(p-tolyl)-1,2,4-oxadiazole-3-carboxamide (****A7****)*. White solid, m.p. 134–135 ℃, Yield 68.6%. 1H NMR (500 MHz, DMSO*-d*6) *δ* 10.91 (s, 1H, N-H), 8.17–8.13 (m, 2H, thienyl-H), 7.69 (d, *J* = 8.5 Hz, 2H, Ph-H), 7.40–7.37 (m, 1H,thienyl-H), 7.19 (d, *J* = 9.0 Hz, 2H, Ph-H), 2.29 (s, 3H, Ph-CH3).13C NMR (101 MHz, DMSO*-d*6) *δ* 172.19, 164.84, 154.84, 135.58, 135.36, 134.45, 134.02, 129.87, 129.65, 129.65, 124.38, 121.27, 121.27, 21.01. HRMS (ESI) m/z for C14H11N3O2S [M+H]+ calcd: 286.06447, found: 286.06366.

*5-(furan-2-yl)-N-(p-tolyl)-1,2,4-oxadiazole-3-carboxamide (****A8****)*. White solid, m.p. 118–119 ℃, yield 55.7%. 1H NMR (500 MHz, DMSO*-d*6) *δ* 10.94 (s, 1H, N-H), 8.22 (dd, *J* = 2.0, 1.0 Hz, 1H, furan-H), 7.67 (dd, *J* = 3.6, 0.8 Hz, 1H, furan-H), 7.65 (d, *J* = 8.4 Hz, 2H, Ph-H), 7.18 (d, *J* = 8.5 Hz, 2H, Ph-H), 6.90 (dd, *J* = 3.5, 1.5 Hz, 1H, furan-H), 2.28 (s, 3H, Ph-CH3). 13C NMR (101 MHz, DMSO*-d*6) *δ* 168.25, 164.68, 154.72, 149.38, 139.06, 135.58, 134.45, 129.64, 129.64, 121.25, 121.25,119.05, 113.81, 21.00. HRMS (ESI) m/z for C14H11N3O3 [M+H]+ calcd: 270.08732, found: 270.08652.

*5-(furan-2-yl)-N-phenyl-1,2,4-oxadiazole-3-carboxamide (****A9****)*. White solid, m.p. 132–133 ℃, yield 60.5%. 1H NMR (400 MHz, DMSO-*d*6) *δ* 10.99 (s, 1H, N-H), 8.22 (s, 1H, Ph-H), 7.81 (d, *J* = 7.6 Hz, 2H, Ph-H), 7.71 (d, *J* = 3.6 Hz, 1H, furan-H), 7.39 (t, *J* = 7.6 Hz, 2H, Ph-H), 7.18 (t, *J* = 7.6 Hz, 1H, furan-H), 6.91 (dd, *J* = 3.6, 1.6 Hz, 1H, furan-H). 13C NMR (101 MHz, DMSO*-d*6) *δ* 168.30, 164.63, 154.93, 149.42, 139.04, 138.08, 129.27, 129.27, 125.34, 121.32, 121.32, 119.11, 113.84. HRMS (ESI) m/z for C13H9N3O3 [M+H]+ calcd: 256.07167, found: 256.07092.

*N-phenyl-5-(thiophen-2-yl)-1,2,4-oxadiazole-3-carboxamide (****A10****)*. White solid, m.p. 169–170 ℃, yield 54.8%. 1H NMR (500 MHz, DMSO*-d*6) *δ* 11.00 (s, 1H, N-H), 8.18–8.14 (m, 2H, thienyl-H), 7.82–7.79 (m, 2H, Ph-H), 7.42–7.37 (m, 3H, Ph-H), 7.18 (t, *J* = 7.5 Hz, 1H, thienyl-H).13C NMR (101 MHz, DMSO*-d*6) *δ* 172.24, 164.79, 155.04, 138.08, 135.41, 134.07, 129.90, 129.28, 129.28, 125.34, 124.36, 121.34, 121.34. HRMS (ESI) m/z for C13H9N3O2S [M+H]+ calcd: 272.04882, found: 272.04791.

*N-(2-chloro-4-(trifluoromethyl)phenyl)-2-(5-(2-(trifluoromethyl)phenyl)-1,2,4-oxadiazol-3-yl)acetamide (****A11****)*. White solid, m.p. 128–129 ℃, yield 65.9%. 1H NMR (400 MHz, DMSO-*d*6) *δ* 10.27 (s, 1H, N-H), 8.13 (s, 1H, Ph-H), 8.13–8.08 (m, 1H, Ph-H), 8.04–0.02 (m, 1H, Ph-H), 7.97–7.89 (m, 3H, Ph-H), 7.72 (d, *J* = 6.6 Hz, 1H, Ph-H), 4.26 (s, 2H, -CH2-). 13C NMR (101 MHz, DMSO-*d*6) *δ* 174.34, 166.59, 166.45, 138.85, 133.78, 133.67, 132.66, 132.66, 127.91 (q, *J* = 39.1 Hz), 127.85 (q, *J* = 2.2 Hz), 127.12 (q, *J* = 3.9 Hz), 126.63 (q, *J* = 32.8 Hz), 125.76, 125.10 (q, *J* = 3.7 Hz),123.61 (q, *J* = 275.6 Hz), 123.50 (q, *J* = 272.3 Hz), 122.18 (d, *J* = 1.6 Hz), 34.12. HRMS (ESI) m/z for C18H10ClF6N3O2Na [M+Na]+ calcd: 472.02579, found: 472.02509.

*2-(5-(2-(trifluoromethyl)phenyl)-1,2,4-oxadiazol-3-yl)-N-(6-(trifluoromethyl)pyridin-2-yl)acetamide (****A12****)*. White solid, m.p. 137–138 ℃, yield 60.5%. 1H NMR (400 MHz, DMSO-*d*6) *δ* 11.40 (s, 1H, N-H), 8.34 (d, *J* = 8.5 Hz, 1H, Py-H), 8.15–8.08 (m, 2H, Ph-H), 8.09–8.02 (m, 1H, Py-H), 7.97–7.90 (m, 2H, Ph-H), 7.64 (d, *J* = 7.5 Hz, 1H, Py-H), 4.18 (s, 2H, -CH2-). 13C NMR (101 MHz, Chloroform-*d*) *δ* 175.09, 165.07, 164.67, 151.09, 146.46 (q, *J* = 35.1 Hz), 139.85, 132.65, 132.24, 132.15, 129.57 (q, *J* = 32.8 Hz), 127.37 (q, *J* = 5.7 Hz), 122.96 (q, *J* = 274.8 Hz), 121.10 (q, *J* = 275.1 Hz), 122.13 (q, *J* = 2.5 Hz), 117.02, 116.48 (d, *J* = 3.0 Hz), 34.98. HRMS (ESI) m/z for C17H10F6N4O2Na [M+Na]+ calcd: 439.06002, found: 439.05917.

*N-(4-(trifluoromethyl)phenyl)-2-(5-(2-(trifluoromethyl)phenyl)-1,2,4-oxadiazol-3-yl)acetamide (****A13****)*. White solid, m.p. 116–117 ℃, yield 51.5%. 1H NMR (400 MHz, DMSO-*d*6) *δ* 10.80 (s, 1H, N-H), 8.17–8.07 (m, 1H, Ph-H), 8.08–8.00 (m, 1H, Ph-H), 7.97–7.90 (m, 2H, Ph-H), 7.82 (d, *J* = 8.5 Hz, 2H, Ph-H), 7.70 (d, *J* = 9.0 Hz, 2H, Ph-H), 4.10 (s, 2H, -CH2-). 13C NMR (101 MHz, Chloroform-*d*) *δ* 174.71, 165.41, 164.40, 140.57, 132.79, 132.39, 131.94, 129.16 (q, *J* = 32.7 Hz), 127.48 (q, *J* = 5.6 Hz), 126.42 (q, *J* = 33.3 Hz), 126.23 (q, *J* = 3.6 Hz), 126.23 (q, *J* = 3.6 Hz), 124.02 (q, *J* =271.6 Hz), 123.11 (q, *J* =273.6 Hz) 121.96 (d, *J* = 1.9 Hz), 119.80, 119.80, 34.78. HRMS (ESI) m/z for C18H11F6N3O2Na [M+Na]+ calcd: 438.06477, found: 438.06421.

*N-(2-(trifluoromethyl)phenyl)-2-(5-(2-(trifluoromethyl)phenyl)-1,2,4-oxadiazol-3-yl)acetamide (****A14****)*. White solid, m.p. 124–125 ℃, yield 53.6%. 1H NMR (400 MHz, DMSO-*d*6) *δ* 10.05 (s, 1H, N-H), 8.12–8.08 (m, 1H, Ph-H), 8.08–8.04 (m, 1H, N-H), 7.99–7.88 (m, 2H, Ph-H), 7.75 (d, *J* = 7.8 Hz, 1H, Ph-H), 7.73–7.65 (m, 1H, Ph-H), 7.54 (d, *J* = 8.0 Hz, 1H, Ph-H), 7.48 (t, *J* = 7.6 Hz, 1H, Ph-H), 4.07 (s, 2H, -CH2-). 13C NMR (101 MHz, Chloroform-*d*) *δ* 175.30, 165.34, 164.29, 134.61 (q, *J* = 1.4 Hz), 132.82, 132.63, 132.25, 132.06, 129.48 (q, *J* = 32.8 Hz), 127.31 (q, *J* = 5.3 Hz), 126.11 (q, *J* = 5.3 Hz), 125.52, 125.23, 123.78 (q, *J* = 273.1 Hz), 122.99 (q, *J* = 273.7 Hz),121.38 (q, *J* = 29.8 Hz) 122.11 (q, *J* = 2.2 Hz), 34.77. HRMS (ESI) m/z for C18H11F6N3O2Na [M+Na]+ calcd: 438.06477, found: 438.06396.

*N-(4-fluorophenyl)-2-(5-(2-(trifluoromethyl)phenyl)-1,2,4-oxadiazol-3-yl)acetamide (****A15****)*. White solid, m.p. 138–139 ℃, yield 51.3%. 1H NMR (400 MHz, DMSO-*d*6) *δ* 10.49 (s, 1H, N-H), 8.14–8.07 (m, 1H, Ph-H), 8.09–8.02 (m, 1H, Ph-H), 7.96–7.94 (m, 2H, Ph-H), 7.64–7.62 (m, 2H, Ph-H), 7.18 (t, *J* = 8.9 Hz, 2H, Ph-H), 4.03 (s, 2H, -CH2-). 13C NMR (101 MHz, DMSO-*d*6) *δ* 174.29, 166.78, 165.23, 158.66 (d, *J* = 240.3 Hz), 135.63 (d, *J* = 2.7 Hz), 133.74 (d, *J* = 12.9 Hz), 133.74 (d, *J* = 12.9 Hz), 132.69, 127.98 (q, *J* = 21.7 Hz), 127.83 (q, *J* = 5.30 Hz), 122.21 (q, *J* = 1.7 Hz), 121.48 (d, *J* = 7.7 Hz), 121.48 (d, *J* = 7.7 Hz), 124.63 (q, *J* = 274.1 Hz),116.00, 115.78, 34.44. HRMS (ESI) m/z for C17H11F4N3O2Na [M+Na]+ calcd: 388.06796, found: 388.06717.

*2-(5-(2-chloro-4-(trifluoromethyl)phenyl)-1,2,4-oxadiazol-3-yl)-N-(6-(trifluoromethyl)pyridin-2-yl)acetamide (****A16****)*. White solid, m.p. 122–123 ℃, yield 49.1%. 1H NMR (400 MHz, DMSO-*d*6) *δ* 11.44 (s, 1H, N-H), 8.35 (t, *J* = 7.7 Hz, 2H, Ph-H), 8.19 (s, 1H, Ph-H), 8.11 (t, *J* = 8.1 Hz, 1H, Py-H), 8.03–7.86 (m, 1H, Py-H), 7.74–7.59 (m, 1H, Py-H), 4.23 (s, 2H, -CH2-). 13C NMR (101 MHz, Chloroform-*d*) *δ* 173.62, 165.16, 164.65, 151.11, 146.43 (q, *J* = 34.9 Hz), 139.93, 135.33 (q, *J* = 33.7 Hz), 135.04, 132.44, 128.78 (q, *J* = 3.9 Hz),125.82, 124.03 (q, *J* = 3.6 Hz), 122.59 (q, *J* = 273.3 Hz), 121.09 (q, *J* = 274.1 Hz), 116.99, 116.50 (q, *J* = 2.9 Hz), 34.79. HRMS (ESI) m/z for C17H9ClF6N4O2Na [M+Na]+ calcd: 473.02104, found: 473.02139.

*2-(5-(thiophen-2-yl)-1,2,4-oxadiazol-3-yl)-N-(2-(trifluoromethyl)phenyl)acetamide (****A17****)*. White solid, m.p. 149–150 ℃, yield 54.3%. 1H NMR (400 MHz, DMSO-*d*6) *δ* 10.02 (s, 1H, N-H), 8.10–8.08 (m, 1H, Ph-H), 8.03–0.02 (m, 1H, Ph-H), 7.76 (d, *J* = 7.9 Hz, 1H, thienyl-H), 7.70 (t, *J* = 7.8 Hz, 1H, Ph-H), 7.56 (t, *J* = 6.6 Hz, 1H, Ph-H), 7.48 (t, *J* = 7.7 Hz, 1H, thienyl-H), 7.36–7.34 (m, 1H, thienyl-H), 4.00 (s, 2H, -CH2-). 13C NMR (101 MHz, Chloroform-*d*) *δ* 172.10, 164.93, 164.15, 137.73, 133.16, 132.78, 128.88, 126.77 (q, *J* = 33.4 Hz), 126.33 (q, *J* = 4.1 Hz), 124.95 (q, *J* = 3.4 Hz), 124.89, 123.28 (q, *J* = 271.9 Hz), 123.00, 121.27, 34.94. HRMS (ESI) m/z for C15H10F3N3O2S [M+Na]+ calcd: 376.03380, found: 376.03259.

*N-(2-chloro-4-(trifluoromethyl)phenyl)-2-(5-(thiophen-2-yl)-1,2,4-oxadiazol-3-yl)acetamide (****A18****)*. White solid, m.p. 170–171 ℃, yield 56.4%. 1H NMR (400 MHz, DMSO-*d*6) *δ* 10.22 (s, 1H, N–H), 8.14 (d, *J* = 8.6 Hz, 1H, thienyl-H), 8.11–8.09 (m, 1H, Ph-H), 8.04–7.95 (m, 1H, Ph-H), 7.95 (s, 1H, Ph-H), 7.74 (d, *J* = 8.7 Hz, 1H, thienyl-H), 7.36–7.34 (m, 1H, thienyl-H). 4.17 (s, 2H, -CH2-). 13C NMR (101 MHz, DMSO-*d*6) *δ* 171.30, 166.55, 166.44, 138.83, 134.58, 133.23, 129.78, 127.16 (q, *J* = 3.8 Hz), 126.57 (q, *J* = 32.8 Hz), 126.10, 125.62, 125.17 (q, *J* = 3.8 Hz), 124.87, 125.17 (q, *J* = 272.7 Hz), 34.05. HRMS (ESI) m/z for C15H9ClF3N3O2S [M+H]+ calcd: 388.01289, found: 388.01147.

*N-((3-(4-fluorophenyl)-1,2,4-oxadiazol-5-yl)methoxy)-2-(trifluoromethyl)benzamide (****B1****)*. White solid, m.p. 125–126 ℃, yield 65.5%. 1H NMR (400 MHz, DMSO-*d*6) *δ* 12.08 (s, 1H, N-H), 8.13–8.08 (m, 2H, Ph-H), 7.81 (d, *J* = 7.7 Hz, 1H, Ph-H), 7.77–7.68 (m, 2H, Ph-H), 7.57 (d, *J* = 7.4 Hz, 1H, Ph-H), 7.47–7.40 (m, 2H, Ph-H), 5.31 (s, 2H, -CH2-). 13C NMR (101 MHz, Chloroform-*d*) *δ* 174.54, 167.68, 166.01, 164.76 (d, *J* = 252.1 Hz), 132.09, 131,28, 130.92, 129.70 (2C) (d, *J* = 8.8 Hz), 129.12, 128.06 (q, *J* = 32.7 Hz), 126.65 (q, *J* = 5.0 Hz), 123.32 (q, *J* = 274.5 Hz),122.28 (d, *J* = 3.4 Hz), 116.18 (2C) (d, *J* = 21.9 Hz), 68.06. HRMS (ESI) m/z for C17H12O3N3F4 [M+H]+ calcd: 382.08093, found: 382.08066.

*N-((3-(4-chlorophenyl)-1,2,4-oxadiazol-5-yl)methoxy)-2-(trifluoromethyl)benzamide (****B2****)*. White solid, m.p. 132–133 ℃, yield 60.8%. 1H NMR (400 MHz, DMSO-*d*6) *δ* 12.08 (s, 1H, N-H), 8.09–8.03 (m, 2H, Ph-H), 7.81 (d, *J* = 7.6 Hz,1H, Ph-H), 7.77–7.72 (m, 2H, Ph-H), 7.70–7.66 (m, 2H, Ph-H), 7.57 (d, *J* = 7.4 Hz, 1H, Ph-H), 5.31 (s, 2H, -CH2-). 13C NMR (101 MHz, Chloroform-*d*) *δ* 174.71, 167.71, 167.71, 137.79, 132.10, 131.73 (d, *J* = 8.0 Hz), 130.94, 130.80, 129.30, 129.30, 128.81, 128.81, 127.85 (q, *J* = 32.5 Hz), 126.66 (q, *J* = 4.7 Hz), 124.51, 123.33 (q, *J* = 274.8 Hz), 68.00. HRMS (ESI) m/z for C17H12O3N3ClF3 [M+H]+ calcd: 398.05138, found: 398.05118.

*2-(trifluoromethyl)-N-((3-(4-(trifluoromethyl)phenyl)-1,2,4-oxadiazol-5-yl)methoxy)benzamide (****B3****)*.White solid, m.p. 133–134 ℃, yield 55.9%. 1H NMR (400 MHz, DMSO-*d*6) *δ* 12.09 (s, 1H, N-H), 8.27 (d, *J* = 8.1 Hz, 2H, Ph-H), 7.97 (d, *J* = 8.2 Hz, 2H, Ph-H), 7.81 (d, *J* = 7.7 Hz, 1H, Ph-H), 7.75 (t, *J* = 7.1 Hz, 1H, Ph-H), 7.69 (t, *J* = 7.5 Hz, 1H, Ph-H), 7.58 (d, *J* = 7.4 Hz, 1H, Ph-H), 5.35 (s, 2H, -CH2-). 13C NMR (101 MHz, Chloroform-*d*) *δ* 174.99, 167.54, 167.54, 133.43 (q, *J* = 32.5 Hz), 132.12, 131.70 (d, *J* = 10.3 Hz), 130.98, 129.47, 129.20, 127.89, 127.89, 126.67 (q, *J* = 4.6 Hz), 126.57 (q, *J* = 6.6 Hz), 125.96 (q, *J* = 3.8 Hz), 125.96 (q, *J* = 3.8 Hz), 123.67 (q, *J* = 273.9 Hz), 123.33 (q, *J* = 275.0 Hz), 68.01. HRMS (ESI) m/z for C18H12O3N3ClF6 [M+H]+ calcd: 432.07774, found: 432.07758.

*N-((3-(p-tolyl)-1,2,4-oxadiazol-5-yl)methoxy)-2-(trifluoromethyl)benzamide (****B4****)*. White solid, m.p. 117–118 ℃, yield 56.8%. 1H NMR (400 MHz, DMSO-*d*6) *δ* 12.10 (s, 1H, N-H), 7.95 (d, *J* = 8.1 Hz, 2H, Ph-H), 7.81 (d, *J* = 9.0 Hz, 1H, Ph-H), 7.76–7.67 (m, 2H, Ph-H), 7.58 (d, *J* = 6.8 Hz, 1H, Ph-H), 7.39 (d, *J* = 8.0 Hz, 2H, Ph-H), 5.32 (s, 2H, -CH2-), 2.38 (s, 3H, Ph-CH3). 13C NMR (101 MHz, DMSO-*d*6) *δ* 175.28, 168.23, 164.80, 142.19, 132.97 (d, *J* = 7.2 Hz), 131.20, 130.35, 130.35, 130.35, 129.63, 127.46, 127.26, 126.99 (q, *J* = 5.8 Hz), 126.90 (q, *J* = 32.5 Hz), 124.00 (q, *J* = 274.9 Hz) 123.68, 67.26, 21.53. HRMS (ESI) m/z for C18H15O3N3F3 [M+H]+ calcd: 378.10600, found: 378.10571.

*N-((3-phenyl-1,2,4-oxadiazol-5-yl)methoxy)-2-(trifluoromethyl)benzamide (****B5****)*. White solid, m.p. 110–111 ℃, yield 59.1%. 1H NMR (400 MHz, DMSO-*d*6) *δ* 12.09 (s, 1H, N-H), 8.07–8.04 (m, 2H, Ph-H), 7.81 (d, *J* = 7.7 Hz, 1H, Ph-H), 7.72 (m, 2H, Ph-H), 7.64–7.54 (m, 4H, Ph-H), 5.31 (s, 2H, -CH2-). 13C NMR (101 MHz, DMSO-*d*6) *δ* 175.48, 168.26, 164.82, 132.97 (d, *J* = 9.1 Hz), 132.20, 131.20, 129.81, 129.81, 129.81, 129.64, 127.52, 127.52, 126.99 (q, *J* = 5.1 Hz), 126.90 (q, *J* = 33.6 Hz), 124.00 (q, *J* = 275.0 Hz), 126.45, 67.27. HRMS (ESI) m/z for C17H13O3N3F3 [M+H]+ calcd: 364.09035, found: 364.09003.

*N-((3-(2-chloro-4-(trifluoromethyl)phenyl)-1,2,4-oxadiazol-5-yl)methoxy)-2-(trifluoromethyl)benzamide (****B6****)*. White solid, m.p. 143–144 ℃, yield 56.9%. 1H NMR (400 MHz, DMSO-*d*6) *δ* 12.12 (s, 1H, N-H), 8.19 (d, *J* = 8.1 Hz, 1H, Ph-H), 8.15 (s, 1H, Ph-H), 7.96 (d, *J* = 8.2 Hz, 1H, Ph-H), 7.81 (d, *J* = 7.6 Hz, 1H, Ph-H), 7.77–7.68 (m, 2H, Ph-H), 7.57 (d, *J* = 7.2 Hz, 1H, Ph-H), 5.37 (s, 2H, -CH2-). 13C NMR (101 MHz, DMSO-*d*6) *δ* 175.43, 166.20, 164.85, 133.66, 133.25, 133.25, 133.01 (q, *J* = 32.9 Hz), 133.00, 132.85, 131.20, 129.60 (d, *J* = 10.1 Hz), 128.36 (q, *J* = 3.8 Hz), 127.35 (d, *J* = 21.8 Hz), 126.98 (q, *J* = 4.2 Hz), 125.10 (q, *J* = 3.8 Hz), 123.98 (q, *J* = 274.8 Hz), 123.39 (q, *J* = 274.2 Hz), 67.21. HRMS (ESI) m/z for C18H11O3N3ClF6 [M+H]+ calcd: 466.03876, found: 466.03867.

*N-((3-(2-chloro-4-(trifluoromethyl)phenyl)-1,2,4-oxadiazol-5-yl)methoxy)-4-(trifluoromethyl)benzamide (****B7****)*. White solid, m.p. 114–115 ℃, yield 45.1%. 1H NMR (400 MHz, DMSO-*d*6) *δ* 12.38 (s, 1H, N-H), 8.17–8.13 (m, 2H, Ph-H), 7.93 (d, *J* = 8.1 Hz, 3H, Ph-H), 7.85 (s, 2H, Ph-H), 5.40 (s, 2H, -CH2-). 13C NMR (101 MHz, DMSO-*d*6) *δ* 170.00, 161.72, 161.72, 129.50, 129.19 (q, *J* = 33.2 Hz), 129.18, 128.93 (q, *J* = 33.4 Hz), 127.49, 127.49, 123.97, 123.37 (q, *J* = 3.8 Hz), 122.75, 120.95 (q, *J* = 3.8 Hz), 120.95 (q, *J* = 3.8 Hz), 119.10 (q, *J* = 3.7 Hz), 118.71 (q, *J* = 273.6 Hz), 118.03 (q, *J* = 273.9 Hz), 63.04. HRMS (ESI) m/z for C18H11O3N3ClF6 [M+H]+ calcd: 466.03876, found: 466.03891.

*N-((3-(2,4-dichlorophenyl)-1,2,4-oxadiazol-5-yl)methoxy)-6-(trifluoromethyl)picolinamide (****B8****)*. White solid, m.p. 134–135 ℃, yield 47.5%. 1H NMR (400 MHz, DMSO-*d*6) *δ* 12.44 (s, 1H, N-H), 8.31 (t, *J* = 7.8 Hz, 1H, Ph-H), 8.24 (d, *J* = 7.8 Hz, 1H, Ph-H), 8.14 (d, *J* = 7.5 Hz, 1H, Py-H), 7.94 (d, *J* = 8.5 Hz, 1H, Py-H), 7.89 (s, 1H, Ph-H), 7.66–7.62 (m, 1H, Py-H), 5.37 (s, 2H, -CH2-). 13C NMR (101 MHz, Chloroform-*d*) *δ* 174.10, 166.64, 161.01, 147.16 (q, *J* = 35.6 Hz), 140.31, 139.48, 137.72, 134.39, 132.61, 131.01, 127.49, 125.29, 124.48 (d, *J* = 2.9 Hz), 123.68 (q, *J* = 2.7 Hz), 120.88 (q, *J* = 274.6 Hz), 68.36. HRMS (ESI) m/z for C16H10O3N4Cl2F3 [M+H]+ calcd: 433.00766, found: 433.00766.

*N-((3-(4-fluorophenyl)-1,2,4-oxadiazol-5-yl)methoxy)-6-(trifluoromethyl)picolinamide (****B9****)*. White solid, m.p. 125–126 ℃, yield 45.9%. 1H NMR (400 MHz, DMSO-*d*6) *δ* 12.43 (s, 1H, N-H), 8.30 (t, *J* = 7.8 Hz, 1H, Py-H), 8.23 (d, *J* = 7.8 Hz, 1H, Py-H), 8.13 (d, *J* = 7.7 Hz, 1H, Py-H), 8.10–8.06 (m, 2H, Ph-H), 7.45–7.40 (m, 2H, Ph-H), 5.34 (s, 2H, -CH2-). 13C NMR (101 MHz, Chloroform-*d*) *δ* 174.57, 167.68, 164.79 (d, *J* = 252.1 Hz), 160.94, 148.84, 147.12 (q, *J* = 35.6 Hz), 139.45, 129.76 (2C) (d, *J* = 9.0 Hz), 125.28, 123.62 (q, *J* = 2.3 Hz), 122.30 (d, *J* = 3.1 Hz), 120.90 (q, *J* = 275.6 Hz), 116.18 (2C) (d, *J* = 21.9 Hz), 68.35. HRMS (ESI) m/z for C16H11O3N4F4 [M+H]+ calcd: 383.07618, found: 383.07596.

*4-chloro-N-((3-(4-fluorophenyl)-1,2,4-oxadiazol-5-yl)methoxy)-2-(trifluoromethyl)benzamide (****B10****)*. White solid, m.p. 146–147 ℃, yield 50.9%. 1H NMR (400 MHz, DMSO-*d*6) *δ* 12.15 (s, 1H, N-H), 8.16–8.01 (m, 2H, Ph-H), 7.92 (s, 1H, Ph-H), 7.87 (d, *J* = 8.4 Hz, 1H, Ph-H), 7.62 (d, *J* = 8.2 Hz, 1H, Ph-H), 7.48–7.38 (m, 2H, Ph-H), 5.32 (s, 2H, -CH2-). 13C NMR (101 MHz, DMSO-*d*6) *δ* 175.56, 167.48, 164.54 (d, *J* = 249.3 Hz), 163.87, 135.91, 133.07, 131.68, 130.12, 130.08 (2C) (d, *J* = 9.0 Hz), 128.98 (q, *J* = 32.7 Hz), 127.13 (q, *J* = 4.3 Hz), 122.99 (d, *J* = 3.3 Hz), 123.08 (q, *J* = 275.6 Hz), 116.89 (2C) (d, *J* = 22.1 Hz), 67.33. HRMS (ESI) m/z for C18H11O3N4ClF4 [M+H]+calcd: 416.04196, found: 416.04187.

*N-((3-(4-fluorophenyl)-1,2,4-oxadiazol-5-yl)methyl)-2-(trifluoromethyl)benzamide (****C1****)*. White solid, m.p. 157–158 ℃, yield 55.9%. 1H NMR (400 MHz, DMSO-*d*6) *δ* 9.45 (t, *J* = 5.7 Hz, 1H, N-H), 8.10–8.06 (m, 2H, Ph-H), 7.83–7.76 (m, 2H, Ph-H), 7.72–7.70 (m, 1H, Ph-H), 7.63 (d, *J* = 7.6 Hz, 1H, Ph-H), 7.43 (t, *J* = 8.9 Hz, 2H, Ph-H), 4.81 (d, *J* = 5.6 Hz, 2H, -CH2-); 13C NMR (101 MHz, DMSO-*d*6) *δ* 177.92, 168.15, 167.35, 164.49 (d, *J* = 249.2 Hz), 135.69 (d, *J* = 2.0 Hz), 133.06, 130.73, 130.00 (2C) (d, *J* = 8.9 Hz), 129.13, 126.88 (q, *J* = 5.0 Hz), 126.65 (q, *J* = 44.4 Hz), 124.08 (q, *J* = 274.7 Hz), 123.15 (d, *J* = 3.1 Hz), 116.99 (2C) (d, *J* = 22,1 Hz), 36.10. HRMS (ESI) m/z for C17H12O2N3F4 [M+H]+calcd: 366.08602, found: 366.08527.

*N-((3-(4-chlorophenyl)-1,2,4-oxadiazol-5-yl)methyl)-2-(trifluoromethyl)benzamide (****C2****)*. White solid, m.p. 178–179 ℃, yield 53.8%. 1H NMR (400 MHz, DMSO-*d*6) *δ* 9.46 (t, *J* = 5.9 Hz, 1H, N-H), 8.05–8.03 (m, 2H, Ph-H), 7.84–7.83(m, 1H, Ph-H), 7.80–7.77 (m, 1H, Ph-H), 7.72–7.70 (m, 1H, Ph-H), 7.64–7.62 (m, 1H, Ph-H), 7.61–7.58 (m, 2H, Ph-H) 4.82 (d, *J* = 5.7 Hz, 2H, -CH2-). 13C NMR (101 MHz, DMSO-*d*6) *δ* 178.04, 168.18, 167.38, 136.89, 135.68 (d, *J* = 2.8 Hz), 133.04, 130.73, 129.96, 129,96, 129.24, 129.24, 129.14, 126.87 (q, *J* = 6.5 Hz), 126.78 (q, *J* = 63.4 Hz), 121.37 (q, *J* = 274.9 Hz), 125.44, 36.13. HRMS (ESI) m/z for C17H12O2N3ClF3 [M+H]+ calcd: 382.05647, found: 382.05725.

*2-(trifluoromethyl)-N-((3-(4-(trifluoromethyl)phenyl)-1,2,4-oxadiazol-5-yl)methyl)benzamide (****C3****)*. White solid, m.p. 168–169 ℃, yield 54.1%. 1H NMR (500 MHz, DMSO-*d*6) *δ* 9.51 (t, *J* = 5.5 Hz, 1H, N-H), 8.24 (d, *J* = 8.5 Hz, 2H, Ph-H), 7.97 (d, *J* = 8.5 Hz, 2H, Ph-H), 7.84–7.76 (m, 2H, Ph-H), 7.70 (t, *J* = 8.0 Hz, 1H, Ph-H), 7.64 (d, *J* = 7.5 Hz, 1H, Ph-H), 4.85 (d, *J* = 5.8 Hz, 2H, -CH2-). 13C NMR (101 MHz, Chloroform-*d*) *δ* 175.97, 167.94, 167.44, 134.43 (d, *J* =2.2 Hz), 133.14 (d, *J* =32.6 Hz), 132.19, 130.52, 129.73, 128.72, 127.87 (2C), 127.80 (q, *J* = 32.0 Hz), 126.60 (q, *J* = 5.0 Hz), 125.93 (2C) (q, *J* = 3.87 Hz), 123.51 (q, *J* = 272.4 Hz), 123.46 (q, *J* = 274.4 Hz), 36.39. HRMS (ESI) m/z for C18H12O2N3F6 [M+H]+ calcd: 416.08282, found: 416.08203.

*N-((3-(p-tolyl)-1,2,4-oxadiazol-5-yl)methyl)-2-(trifluoromethyl)benzamide (****C4****)*. White solid, m.p. 159–160 ℃, yield 54.3%. 1H NMR (400 MHz, DMSO-*d*6) *δ* 9.45 (t, *J* = 8.0 Hz, 1H, N-H), 7.92 (d, *J* = 8.0 Hz, 2H, Ph-H), 7.86–7.76 (m, 2H, Ph-H), 7.74–7.67 (m, 1H, Ph-H), 7.64 (d, *J* = 8.0 Hz, 1H, Ph-H), 7.39 (d, *J* = 8.0 Hz, 1H, Ph-H), 4.82 (d, *J* = 4.0 Hz, 2H, -CH2-), 2.39 (s, 3H, Ph-CH3). 13C NMR (101 MHz, DMSO-*d*6) *δ* 177.58, 168.14, 168.10, 142.08, 135.72 (d, *J* = 2.2 Hz), 133.06, 130.72, 130.33 (2C), 129.13, 127.40 (2C), 126.88 (q, *J* = 5.0 Hz), 126.29 (q, *J* = 31.3 Hz), 124.10 (q, *J* = 274.7 Hz), 123.83, 36.09, 21.54. HRMS (ESI) m/z for C18H15O2N3F3 [M+H]+ calcd: 362.1109, found: 362.11023.

*N-((3-phenyl-1,2,4-oxadiazol-5-yl)methyl)-2-(trifluoromethyl)benzamide (****C5****)*. White solid, m.p. 147–148 ℃, yield 58.5%. 1H NMR (500 MHz, DMSO-*d*6) *δ* 9.51 (t, *J* = 5.8 Hz, 1H, N-H), 8.11–8.00 (m, 2H, Ph-H), 7.89–7.74 (m, 2H, Ph-H), 7.70 (t, *J* = 7.5 Hz, 1H, Ph-H), 7.64 (d, *J* = 7.8 Hz, 1H, Ph-H), 7.62–7.58 (m, 3H, Ph-H), 4.83 (d, *J* = 5.7 Hz, 2H, -CH2-). 13C NMR (101 MHz, Chloroform-*d*) *δ* 175.42, 168.43, 167.94, 134.54 (d, *J* = 1.7 Hz), 132.15, 131.45, 130.41, 128.93, 128.93, 128.69, 127.48, 127.48, 127.40 (q, *J* = 32.1 Hz), 126.55 (q, *J* = 5.0 Hz), 126.31, 123.47 (q, *J* = 273.3 Hz), 36.35. HRMS (ESI) m/z for C17H13O2N3F3 [M+H]+ calcd: 348.09544, found: 348.09464.

*N-((3-(2-chloro-4-(trifluoromethyl)phenyl)-1,2,4-oxadiazol-5-yl)methyl)-2-(trifluoromethyl)benzamide (****C6****)*. White solid, m.p. 166–167 ℃, yield 48.9%. 1H NMR (500 MHz, DMSO-*d*6) *δ* 9.53 (t, *J* = 5.8 Hz, 1H, N-H), 8.25–8.15 (m, 2H, Ph-H), 7.96 (dd, *J* = 8.4, 1.9 Hz, 1H, Ph-H), 7.83 (d, *J* = 8.0 Hz, 1H, Ph-H), 7.79 (t, *J* = 7.6 Hz, 1H, Ph-H), 7.70 (t, *J* = 7.7 Hz, 1H, Ph-H), 7.63 (d, *J* = 6.8 Hz, 1H, Ph-H), 4.87 (d, *J* = 5.8 Hz, 2H, -CH2-). 13C NMR (101 MHz, Chloroform-*d*) *δ* 175.49, 167.93, 166.44,134.40 (q, *J* = 1.7 Hz), 134.31, 133.90 (q, *J* = 33.73Hz), 132.32, 132.21, 130.56, 129.06, 128.75, 128.10 (q, *J* = 3.7 Hz), 127.58 (q, *J* = 31.9 Hz), 126.61 (q, *J* = 5.0 Hz), 123.79 (q, *J* = 3.7 Hz), 122.97 (q, *J* = 274.1 Hz), 122.88 (q, *J* = 274.0 Hz), 36.32. HRMS (ESI) m/z for C18H11O2N3ClF6 [M+H]+ calcd: 450.04385, found: 450.04294.

*N-((3-(2-chloro-4-(trifluoromethyl)phenyl)-1,2,4-oxadiazol-5-yl)methyl)-4-(trifluoromethyl)benzamide (****C7****)*. White solid, m.p. 167–168 ℃, yield 50.7%. 1H NMR (400 MHz, DMSO-*d*6) *δ* 9.70 (t, *J* = 5.6 Hz, 1H, N-H), 8.14 (m, 4H, Ph-H), 7.97–7.85 (m, 3H, Ph-H), 4.92 (d, *J* = 5.4 Hz, 2H, -CH2-). 13C NMR (101 MHz, DMSO-*d*6) *δ* 178.00, 166.19, 166.16, 137.39, 133.63, 133.25, 132.91 (q, *J* = 32.8 Hz), 132.16 (q, *J* = 31.9 Hz), 129.71, 128.80, 128.80, 128.29 (q, *J* = 3.8 Hz), 126.05 (2C) (q, *J* = 3.8 Hz), 124.34 (q, *J* = 273.3 Hz),123.40 (q, *J* = 274.2 Hz), 36.45. HRMS (ESI) m/z for C18H11O2N3ClF6 [M+H]+calcd: 450.04385, found: 450.04309.

*N-((3-(2,4-dichlorophenyl)-1,2,4-oxadiazol-5-yl)methyl)-6-(trifluoromethyl)picolinamide (****C8****)*. White solid, m.p. 116–117 ℃, yield 51.7%. 1H NMR (400 MHz, DMSO-*d*6) *δ* 9.59 (t, *J* = 5.9 Hz, 1H, N-H), 8.34 (s, 1H, Ph-H), 8.33 (d, *J* = 3.0 Hz, 1H, Py-H), 8.17–8.15 (m, 1H, Py-H), 7.92 (d, *J* = 8.4 Hz, 1H, Ph-H), 7.87 (d, *J* = 2.1 Hz, 1H, Ph-H), 7.61–7.60 (m, 1H, Py-H), 4.92 (d, *J* = 6.0 Hz, 2H, -CH2-). 13C NMR (101 MHz, Chloroform-*d*) *δ* 175.31, 166.61, 163.34, 149.19, 147.07 (q, *J* = 35.7 Hz), 139.38, 137.45, 134.30, 132.54, 130.86, 127.34, 125.29, 124.20, 123.32 (q, *J* = 3.3 Hz), 120.97 (q, *J* = 275.2 Hz), 35.75. HRMS (ESI) m/z for C16H10O2N4Cl2F3 [M+H]+ calcd: 417.01274, found: 417.01193.

*N-((3-(4-fluorophenyl)-1,2,4-oxadiazol-5-yl)methyl)-6-(trifluoromethyl)picolinamide (****C9****)*. White solid, m.p. 72–73 ℃, yield 55.3%. 1H NMR (400 MHz, DMSO-*d*6) *δ* 9.62 (t, *J* = 5.9 Hz, 1H, N-H), 8.39–8.35 (m, 2H, Ph-H), 8.19–8.17 (m, 1H, Ph-H), 8.10–8.02 (m, 2H, Ph-H), 7.40 (t, *J* = 8.9 Hz, 2H, Ph-H), 4.93 (d, *J* = 5.9 Hz, 2H, -CH2-). 13C NMR (101 MHz, Chloroform-*d*) *δ* 175.74, 167.73, 165.91, 164.66 (d, *J* = 252.1 Hz), 149.29, 147.09 (q, *J* = 35.4 Hz), 139.40, 129.70 (2C) (d, *J* = 8.8 Hz), 125.32, 123.32 (q, *J* = 2.9 Hz), 122.62 (d, *J* = 3.5 Hz), 121.03 (q, *J* = 275.6 Hz),116.07 (2C) (d, *J* = 22.3 Hz), 35.81. HRMS (ESI) m/z for C16H11O2N4F4 [M+H]+ calcd: 367.08126, found: 367.08072.

*2-chloro-N-((3-(4-fluorophenyl)-1,2,4-oxadiazol-5-yl)methyl)-4-(trifluoromethyl)benzamide (****C10****)*. White solid, m.p. 144–145 ℃, yield 58.1%. 1H NMR (400 MHz, DMSO-*d*6) *δ* 9.53 (t, *J* = 5.7 Hz, 1H, N-H), 8.12–8.03 (m, 2H, Ph-H), 7.97–7.85 (m, 2H, Ph-H), 7.67 (d, *J* = 8.2 Hz, 1H, Ph-H), 7.43 (t, *J* = 8.8 Hz, 2H, Ph-H), 4.83 (d, *J* = 5.8 Hz, 2H, -CH2-). 13C NMR (101 MHz, Chloroform-*d*) *δ* 175.43, 167.61, 167.06, 164.71 (d, *J* = 252.1 Hz), 136.72, 132.79 (q, *J* = 2.0 Hz), 132.18, 130.17, 129.63 (2C) (d, *J* = 8.8 Hz), 129.20 (d, *J* = 32.8 Hz), 126.94 (q, *J* = 5.1 Hz), 122.58 (q, *J* = 274.4 Hz), 122.48 (d, *J* = 3.5 Hz), 116.16 (2C) (d, *J* = 21.9 Hz), 36.30. HRMS (ESI) m/z for C17H11O2N3ClF4 [M+H]+ calcd: 400.04704, found: 400.04630.

1H NMR of compound **A1**

13C NMR of compound **A1**

HRMS of compound **A1**

1H NMR of compound **A2**

13C NMR of compound **A2**

HRMS of compound **A2**

1H NMR of compound **A3**

13C NMR of compound **A3**

HRMS of compound **A3**

1H NMR of compound **A4**

13C NMR of compound **A4**

HRMS of compound **A4**

1H NMR of compound **A5**

13C NMR of compound **A5**

HRMS of compound **A5**

1H NMR of compound **A6**

13C NMR of compound **A6**

HRMS of compound **A6**

1H NMR of compound **A7**

13C NMR of compound **A7**

HRMS of compound **A7**

1H NMR of compound **A8**

13C NMR of compound **A8**

HRMS of compound **A8**

1H NMR of compound **A9**

13C NMR of compound **A9**

HRMS of compound **A9**

1H NMR of compound **A10**

13C NMR of compound **A10**

HRMS of compound **A10**

1H NMR of compound **A11**

13C NMR of compound **A11**

HRMS of compound **A11**

1H NMR of compound **A12**

13C NMR of compound **A12**

HRMS of compound **A12**

1H NMR of compound **A13**

13C NMR of compound **A13**

HRMS of compound **A13**

1H NMR of compound **A14**

13C NMR of compound **A14**

HRMS of compound **A14**

1H NMR of compound **A15**

13C NMR of compound **A15**

HRMS of compound **A15**

1H NMR of compound **A16**

13C NMR of compound **A16**HRMS of compound **A16**

1H NMR of compound **A17**

13C NMR of compound **A17**

HRMS of compound **A17**

1H NMR of compound **A18**

13C NMR of compound **A18**

HRMS of compound **A18**

1H NMR of compound **B1**

13C NMR of compound **B1**

HRMS of compound **B1**

1H NMR of compound **B2**

13C NMR of compound **B2**

HRMS of compound **B2**

1H NMR of compound **B3**

13C NMR of compound **B3**

HRMS of compound **B3**

1H NMR of compound **B4**

13C NMR of compound **B4**

HRMS of compound **B4**

1H NMR of compound **B5**

13C NMR of compound **B5**

HRMS of compound **B5**

1H NMR of compound **B6**

13C NMR of compound **B6**

HRMS of compound **B6**

1H NMR of compound **B7**

13C NMR of compound **B7**

HRMS of compound **B7**

1H NMR of compound **B8**

13C NMR of compound **B8**

HRMS of compound **B8**

1H NMR of compound **B9**

13C NMR of compound **B9**

HRMS of compound **B9**

1H NMR of compound **B10**

13C NMR of compound **B10**

HRMS of compound **B10**

1H NMR of compound **C1**

13C NMR of compound **C1**

HRMS of compound **C1**

1H NMR of compound **C2**

13C NMR of compound **C2**

HRMS of compound **C2**

1H NMR of compound **C3**

13C NMR of compound **C3**

HRMS of compound **C3**

1H NMR of compound **C4**

13C NMR of compound **C4**

HRMS of compound **C4**

1H NMR of compound **C5**

13C NMR of compound **C5**

HRMS of compound **C5**

1H NMR of compound **C6**

13C NMR of compound **C6**

HRMS of compound **C6**

1H NMR of compound **C7**

13C NMR of compound **C7**

HRMS of compound **C7**

1H NMR of compound **C8**

13C NMR of compound **C8**

HRMS of compound **C8**

1H NMR of compound **C9**

13C NMR of compound **C9**

HRMS of compound **C9**

1H NMR of compound **C10**

13C NMR of compound **C10**

HRMS of compound **C10**
